# Supplementary material
Source: Research Square preprint supplement (doi:10.21203/rs.3.rs-9075320/v1)
Supplement: Supplementary file 1 [file ae75768ee9952fb3f43793a5.docx]

**Additional files**

Additional file 1：RT-qPCR primers.

| **primer** | **sequence** | |
| --- | --- | --- |
| PPP1CA F | GCCTGCTGGAAGGTGACATA |
| PPP1CA R | GGCAGATGGTCTCCAAGGAC |
| LCK F | GGAGGACCATGTGAATGGGG |
| LCK R | CATTTCGGATGAGCAGCGTG |
| H-GAPDH F | ATGGGCAGCCGTTAGGAAAG |
| H-GAPDH R | AGGAAAAGCATCACCCGGAG |
